# Supplementary material
Source: HighWire-hosted journal article supplement (http://www.qdcxjkg.com/highwire/filestream/113606/field_highwire_adjunct_files/5/patient_info_-_tests_conducted_in_tb_clinics_-_somali.pdf)
Supplement: patient_info_-_tests_conducted_in_tb_clinics_-_somali.pdf [file patient_info_-_tests_conducted_in_tb_clinics_-_somali.pdf]

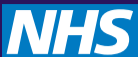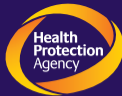

# Baadhitaanno lagu sameeyey xarumo daaweyn qaaxo (TB)

Patient information:

HIV testing in TB clinics (Somali)

## Raajo laabta ah

Kan waxaa loo sameeyaa si baadhitaan loogu sameeyo haddii aad qabto qaaxada sambabka. Waxaa laga yaabaa in mar dambe lagugu celiyo si loo eego in daaweynta lagu sameeyey shaqaynayso.

## Baadhitaan xaako

Waxaa laga yaabaa in lagu weydiiyo inaad dhiibto xaako si baadhitaan loogu sameeyo in aad qabto qaaxada sambabka. Baadhitaanka waxaa laga yaabaa in mar dambe lagugu celiyo si loo eego in daaweynta lagu sameeyey shaqaynayso.

## Baadhitaanno dhiig

Baadhitaanno dhiig waxay muujin karaan haddii ay ku hayso dhiig yaraan ama uu jidhkaaga cudur ku jiro. In dib loo sameeyo baadhitaannadan marka daaweyntu bilaabato ka dib waxay noo sheegi kartaa in cudurku kaa baaba'ayo.

Waxaa la sameeyaa baadhitaanno kale oo noo sheega sida beerkaaga iyo kelyahaagu u shaqaynayaan daaweynta ka hor iyo ka dib. Baadhitaannadaasi waa muhiim, waayo qaar ka mid ah daawooyinkaaga waxay waxyeelo u geysan karaan sida beerkaaga iyo kelyahaagu u shaqeeyaan.

## Baadhitaanno cudurro kale

Waxaannu bixinnaa baadhitaan HIV, oo aannu siinno qof kasta oo yimaadda xarun daaweyn qaaxo. HIV waxay dhaawacdaa hannaanka difaaca ee jidhka, sidaa darteedna qaaxada ayaa si fudud loo qaadi karaa. Waxaa jirta daaweyn wanaagsan oo HIV oo caafimaadkaaga hagaajin karta.

## Baadhitaanno cudurro kale

Waxaa kale oo aannu kaa baadhi karnaa cudurrada hepatitis B iyo hepatitis C (cudurro beerka ku dhaca). Cudurradaasi waxay dhaawac u geysan karaan sida beerkaagu u shaqeeyo waxayna saamayn ku yeelan karaan daaweyntaada qaaxada. Haddii lagaa helo xanuunnadaas waxaa laga yaabaa in lagu gudbiyo koox takhasus u leh.

## Qarsoodi

Natijjooyinka dhammaan baadhitaannadaada waxaa lagu hayn doonaa qarsoodi warbixintana waxaa kaliya oo lala wadaagi doonaa xirfadlayaasha daryeelka caafimaad ee sida tooska ah ugu lug leh daryeelkaaga.

## Warbixin dheeraad ah

### HIV

NAHIP: [www.nahip.org.uk](http://www.nahip.org.uk)

Do It Right:

[www.doitright.uk.com](http://www.doitright.uk.com)

THT: [www.tht.org.uk](http://www.tht.org.uk)

### Qaaxo (TB)

NKS TB:

[www.hpa.org.uk/tbknowledge](http://www.hpa.org.uk/tbknowledge)

TB Alert: [www.tbalert.org](http://www.tbalert.org)

### Bogag kale oo internet oo waxtar leh

NHS choices: [www.nhs.uk](http://www.nhs.uk)

Health Protection Agency:

[www.hpa.org.uk](http://www.hpa.org.uk)
